# Supplementary material for: Antimicrobial Resistance and Clonal Lineages of Staphylococcus aureus from Cattle, Their Handlers, and Their Surroundings: A Cross-Sectional Study from the One Health Perspective
Source: MDPI journal article supplement (doi:10.3390/microorganisms10050941), 2022-04-30
Supplement: s1 [file s1]

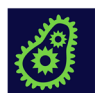

## Article

# Antimicrobial Resistance and Clonal Lineages of *Staphylococcus Aureus* from Cattle, Their Handlers, and Their Surroundings: A Cross-Sectional Study from the One Health Perspective

## Supplementary Materials

**Table S1.** Farms, date and location of sample collection and distribution of the *S. aureus* isolates among cows, farmer and environment samples.

| Farm | Date       | Location   | Sample | Sex | Year of birth | Breed             | Isolate |
|------|------------|------------|--------|-----|---------------|-------------------|---------|
| 1    | 25.02.2019 | Vila Marim | Cow    | F   | 2005          | Maronesa          | –       |
|      | 25.02.2019 | Vila Marim | Cow    | F   | 2007          | Maronesa          | –       |
|      | 25.02.2019 | Vila Marim | Water  | –   | –             | –                 | –       |
|      | 25.02.2019 | Vila Marim | Soil   | –   | –             | –                 | –       |
|      | 25.02.2019 | Vila Marim | Farmer | –   | –             | –                 | –       |
| 2    | 25.02.2019 | Vila Marim | Cow    | F   | 2012          | Crossbreed        | –       |
|      | 25.02.2019 | Vila Marim | Cow    | F   | 2014          | Crossbreed        | –       |
|      | 25.02.2019 | Vila Marim | Cow    | F   | 2013          | Crossbreed        | –       |
|      | 25.02.2019 | Vila Marim | Cow    | F   | 2014          | Crossbreed        | –       |
|      | 25.02.2019 | Vila Marim | Cow    | F   | 2017          | Crossbreed        | –       |
|      | 25.02.2019 | Vila Marim | Cow    | F   | 2015          | Holstein-Friesian | –       |
|      | 25.02.2019 | Vila Marim | Cow    | F   | 2017          | Crossbreed        | –       |
|      | 25.02.2019 | Vila Marim | Water  | –   | –             | –                 | –       |
|      | 25.02.2019 | Vila Marim | Soil   | –   | –             | –                 | –       |
|      | 25.02.2019 | Vila Marim | Cow    | –   | –             | –                 | –       |
| 3    | 25.02.2019 | Vila Marim | Cow    | –   | –             | –                 | –       |
|      | 25.02.2019 | Vila Marim | Cow    | F   | 2015          | Holstein-Friesian | VS3218  |
|      | 25.02.2019 | Vila Marim | Cow    | M   | 2018          | Crossbreed        | –       |
|      | 25.02.2019 | Vila Marim | Cow    | M   | 2018          | Crossbreed        | –       |
|      | 25.02.2019 | Vila Marim | Cow    | M   | 2018          | Crossbreed        | –       |
|      | 25.02.2019 | AGAREZ     | Cow    | F   | 2015          | Holstein-Friesian | –       |
|      | 25.02.2019 | Vila Marim | Soil   | –   | –             | –                 | –       |
| 4    | 25.02.2019 | Vila Marim | Soil   | –   | –             | –                 | –       |
|      | 25.02.2019 | Vila Marim | Cow    | F   | 2015          | Maronesa          | –       |
|      | 25.02.2019 | Vila Marim | Cow    | F   | 2012          | Maronesa          | –       |
|      | 25.02.2019 | Vila Marim | Water  | –   | –             | –                 | –       |
|      | 25.02.2019 | Vila Marim | Soil   | –   | –             | –                 | –       |
| 5    | 25.02.2019 | Vila Marim | Farmer | –   | –             | –                 | –       |
|      | 25.02.2019 | Vila Marim | Cow    | F   | 2011          | Holstein-Friesian | –       |
|      | 25.02.2019 | Vila Marim | Water  | –   | –             | –                 | –       |
| 6    | 25.02.2019 | Vila Marim | Soil   | –   | –             | –                 | –       |
|      | 25.02.2019 | Vila Marim | Cow    | F   | 2013          | Maronesa          | –       |
|      | 25.02.2019 | Vila Marim | H5     | –   | –             | –                 | VS3219  |
| 7    | 25.02.2019 | Vila Marim | Cow    | F   | 2009          | Maronesa          | –       |
|      | 25.02.2019 | Vila Marim | Cow    | F   | 2006          | Maronesa          | –       |
|      | 25.02.2019 | Vila Marim | Water  | –   | –             | –                 | –       |

|    |            |                  |        |   |      |            |        |
|----|------------|------------------|--------|---|------|------------|--------|
|    | 25.02.2019 | Vila Marim       | Soil   | – | –    | –          | –      |
|    | 25.02.2019 | Vila Marim       | Farmer | – | –    | –          | –      |
|    | 25.02.2019 | Vila Marim       | Farmer | – | –    | –          | –      |
| 8  | 25.02.2019 | Vila Marim       | Cow    | F | 2009 | Maronesa   | –      |
|    | 25.02.2019 | Vila Marim       | Cow    | F | 2009 | Maronesa   | –      |
|    | 25.02.2019 | Vila Marim       | Water  | – | –    | –          | –      |
|    | 25.02.2019 | Vila Marim       | Soil   | – | –    | –          | –      |
|    | 25.02.2019 | Vila Marim       | Farmer | – | –    | –          | –      |
|    | 25.02.2019 | Vila Marim       | Farmer | – | –    | –          | –      |
|    | 25.02.2019 | Vila Marim       | Farmer | – | –    | –          | –      |
| 9  | 25.02.2019 | Vila Marim       | Cow    | F | 2018 | Crossbreed | –      |
| 10 | 04.03.2019 | Sirarelhos       | Cow    | F | 2004 | Maronesa   | VS3220 |
|    | 04.03.2019 | Sirarelhos       | Cow    | F | 2008 | Maronesa   | VS3221 |
|    | 04.03.2019 | Sirarelhos       | Cow    | F | 2006 | Maronesa   | VS3222 |
|    | 04.03.2019 | Sirarelhos       | Farmer | – | –    | –          | –      |
|    | 04.03.2019 | Sirarelhos       | Farmer | – | –    | –          | –      |
|    | 04.03.2019 | Sirarelhos       | Farmer | – | –    | –          | –      |
|    | 04.03.2019 | Sirarelhos       | Farmer | – | –    | –          | –      |
|    | 04.03.2019 | Sirarelhos       | Water  | – | –    | –          | –      |
|    | 04.03.2019 | Sirarelhos       | Cow    | F | 2004 | Maronesa   | –      |
|    | 04.03.2019 | Sirarelhos       | Cow    | F | 2007 | Maronesa   | –      |
|    | 04.03.2019 | Sirarelhos       | Cow    | F | 2012 | Maronesa   | –      |
|    | 04.03.2019 | Sirarelhos       | Cow    | F | 2012 | Maronesa   | –      |
|    | 04.03.2019 | Sirarelhos       | Soil   | – | –    | –          | –      |
|    | 04.03.2019 | Sirarelhos       | Farmer | – | –    | –          | –      |
| 11 | 04.03.2019 | Sirarelhos       | Cow    | F | 2011 | Maronesa   | –      |
|    | 04.03.2019 | Sirarelhos       | Cow    | F | 2012 | Maronesa   | –      |
|    | 04.03.2019 | Sirarelhos       | Soil   | – | –    | –          | –      |
| 12 | 04.03.2019 | Galegos da Serra | Cow    | F | 2011 | Maronesa   | –      |
|    | 04.03.2019 | Galegos da Serra | Cow    | F | 2009 | Maronesa   | –      |
|    | 04.03.2019 | Galegos da Serra | Water  | – | –    | –          | –      |
|    | 04.03.2019 | Galegos da Serra | Soil   | – | –    | –          | –      |
| 13 | 04.03.2019 | Sirarelhos       | Cow    | F | 2008 | Maronesa   | –      |
|    | 04.03.2019 | Sirarelhos       | Cow    | F | 2010 | Maronesa   | –      |
|    | 04.03.2019 | Sirarelhos       | Cow    | F | 2015 | Maronesa   | VS3223 |
|    | 04.03.2019 | Sirarelhos       | Cow    | F | 2002 | Maronesa   | –      |
|    | 04.03.2019 | Sirarelhos       | Cow    | F | 2012 | Maronesa   | VS3224 |
|    | 04.03.2019 | Sirarelhos       | Cow    | F | 2008 | Maronesa   | VS3225 |
|    | 04.03.2019 | Sirarelhos       | Cow    | F | 2004 | Maronesa   | –      |
|    | 04.03.2019 | Sirarelhos       | Cow    | F | 2001 | Maronesa   | VS3226 |
|    | 04.03.2019 | Sirarelhos       | Cow    | F | 2010 | Maronesa   | –      |
|    | 04.03.2019 | Sirarelhos       | Cow    | F | 2017 | Maronesa   | –      |
|    | 04.03.2019 | Sirarelhos       | Water  | – | –    | –          | –      |
|    | 04.03.2019 | Sirarelhos       | Soil   | – | –    | –          | –      |
|    | 04.03.2019 | Sirarelhos       | Farmer | – | –    | –          | VS3227 |
|    | 04.03.2019 | Sirarelhos       | Farmer | – | –    | –          | VS3228 |
|    | 04.03.2019 | Sirarelhos       | Farmer | – | –    | –          | VS3229 |
|    | 04.03.2019 | Sirarelhos       | Farmer | – | –    | –          | –      |
| 14 | 04.03.2019 | Sirarelhos       | Cow    | M | 2016 | Maronesa   | –      |
|    | 04.03.2019 | Sirarelhos       | Cow    | F | 2007 | Maronesa   | –      |
|    | 04.03.2019 | Sirarelhos       | Cow    | F | 2006 | Maronesa   | –      |
|    | 04.03.2019 | Sirarelhos       | Cow    | F | 2016 | Maronesa   | –      |
|    | 04.03.2019 | Sirarelhos       | Cow    | F | 2007 | Maronesa   | –      |
|    | 04.03.2019 | Sirarelhos       | Cow    | F | 2017 | Maronesa   | –      |
|    | 04.03.2019 | Sirarelhos       | Soil   | – | –    | –          | VS3230 |
|    | 04.03.2019 | Sirarelhos       | Water  | – | –    | –          | –      |
| 15 | 04.03.2019 | Sirarelhos       | Cow    | F | 2010 | Maronesa   | –      |
|    | 04.03.2019 | Sirarelhos       | Cow    | F | 2013 | Maronesa   | –      |

|    |            |                  |        |   |      |                   |        |
|----|------------|------------------|--------|---|------|-------------------|--------|
|    | 04.03.2019 | Sirarelhos       | Cow    | F | 2011 | Maronesa          | –      |
|    | 04.03.2019 | Sirarelhos       | Cow    | F | 2017 | Maronesa          | –      |
|    | 04.03.2019 | Sirarelhos       | Cow    | F | 2016 | Maronesa          | –      |
|    | 04.03.2019 | Sirarelhos       | Cow    | F | 2017 | Maronesa          | VS2331 |
|    | 04.03.2019 | Sirarelhos       | Cow    | F | 2013 | Maronesa          | VS2332 |
|    | 04.03.2019 | Sirarelhos       | Cow    | F | 2004 | Maronesa          | –      |
|    | 04.03.2019 | Sirarelhos       | Cow    | F | 2012 | Maronesa          | –      |
|    | 04.03.2019 | Sirarelhos       | Cow    | F | 2005 | Maronesa          | –      |
|    | 04.03.2019 | Sirarelhos       | Cow    | F | 2010 | Maronesa          | –      |
|    | 04.03.2019 | Sirarelhos       | Cow    | F | 2010 | Maronesa          | –      |
|    | 04.03.2019 | Sirarelhos       | Soil   | – | –    | –                 | –      |
|    | 04.03.2019 | Sirarelhos       | Water  | – | –    | –                 | –      |
|    | 04.03.2019 | Sirarelhos       | Cow    | F | 2013 | Maronesa          | –      |
|    | 04.03.2019 | Sirarelhos       | Cow    | F | 2013 | Maronesa          | –      |
| 16 | 04.03.2019 | Sirarelhos       | Cow    | F | 2008 | Maronesa          | –      |
|    | 04.03.2019 | Sirarelhos       | Cow    | F | 2010 | Maronesa          | VS2333 |
|    | 04.03.2019 | Sirarelhos       | Cow    | F | 2010 | Maronesa          | VS2334 |
|    | 04.03.2019 | Sirarelhos       | Cow    | F | 2013 | Maronesa          | –      |
|    | 04.03.2019 | Sirarelhos       | Cow    | F | 2015 | Maronesa          | –      |
|    | 04.03.2019 | Sirarelhos       | Cow    | F | 2017 | Maronesa          | –      |
|    | 04.03.2019 | Sirarelhos       | Cow    | F | 2017 | Maronesa          | VS2335 |
|    | 04.03.2019 | Sirarelhos       | Cow    | F | 2018 | Maronesa          | –      |
|    | 04.03.2019 | Sirarelhos       | Water  | – | –    | –                 | –      |
|    | 04.03.2019 | Sirarelhos       | Soil   | – | –    | –                 | –      |
|    | 04.03.2019 | Sirarelhos       | Farmer | – | –    | –                 | VS2336 |
|    | 04.03.2019 | Sirarelhos       | Farmer | – | –    | –                 | VS2337 |
|    | 04.03.2019 | Sirarelhos       | Farmer | – | –    | –                 | VS2338 |
|    | 04.03.2019 | Sirarelhos       | Farmer | – | –    | –                 | VS2339 |
|    | 04.03.2019 | Sirarelhos       | Farmer | – | –    | –                 | VS2340 |
|    | 04.03.2019 | Sirarelhos       | Farmer | – | –    | –                 | –      |
| 17 | 04.03.2019 | Sirarelhos       | Cow    | F | 2013 | Maronesa          | VS2341 |
|    | 04.03.2019 | Sirarelhos       | Cow    | F | 2013 | Maronesa          | –      |
|    | 04.03.2019 | Sirarelhos       | Cow    | F | 2009 | Maronesa          | –      |
|    | 04.03.2019 | Sirarelhos       | Cow    | F | 2011 | Maronesa          | VS3242 |
|    | 04.03.2019 | Sirarelhos       | Cow    | F | 2013 | Maronesa          | –      |
|    | 04.03.2019 | Sirarelhos       | Cow    | F | 2016 | Maronesa          | –      |
|    | 04.03.2019 | Sirarelhos       | Cow    | F | 2006 | Maronesa          | –      |
|    | 04.03.2019 | Sirarelhos       | Cow    | F | 2006 | Maronesa          | –      |
|    | 04.03.2019 | Sirarelhos       | Soil   | – | –    | –                 | –      |
| 18 | 04.03.2019 | Sirarelhos       | Farmer | – | –    | –                 | –      |
|    | 04.03.2019 | Sirarelhos       | Farmer | – | –    | –                 | –      |
| 19 | 04.03.2019 | Sirarelhos       | Cow    | F | 2018 | Crossbreed        | –      |
|    | 04.03.2019 | Sirarelhos       | Cow    | M | 2018 | Holstein-Friesian | –      |
|    | 12.03.2019 | Galegos da Serra | Cow    | F | 2003 | Maronesa          | –      |
|    | 12.03.2019 | Galegos da Serra | Cow    | F | 2014 | Maronesa          | –      |
|    | 12.03.2019 | Galegos da Serra | Water  | – | –    | –                 | –      |
|    | 12.03.2019 | Galegos da Serra | Soil   | – | –    | –                 | –      |
|    | 12.03.2019 | Galegos da Serra | Farmer | – | –    | –                 | –      |
| 20 | 12.03.2019 | Galegos da Serra | Farmer | – | –    | –                 | –      |
|    | 12.03.2019 | Galegos da Serra | Cow    | F | 2005 | Maronesa          | –      |
|    | 12.03.2019 | Galegos da Serra | Cow    | F | 2010 | Maronesa          | –      |
|    | 12.03.2019 | Galegos da Serra | Cow    | F | 2014 | Maronesa          | –      |
|    | 12.03.2019 | Galegos da Serra | Cow    | F | 2014 | Maronesa          | –      |
|    | 12.03.2019 | Galegos da Serra | Water  | – | –    | –                 | –      |
|    | 12.03.2019 | Galegos da Serra | Soil   | – | –    | –                 | –      |
|    | 12.03.2019 | Galegos da Serra | Farmer | – | –    | –                 | –      |
|    | 12.03.2019 | Galegos da Serra | Farmer | – | –    | –                 | VS3243 |

|    |            |                  |        |   |      |                   |       |
|----|------------|------------------|--------|---|------|-------------------|-------|
| 21 | 12.03.2019 | Galegos da Serra | Cow    | F | 2016 | Maronesa          | –     |
|    | 12.03.2019 | Galegos da Serra | Cow    | F | 2011 | Maronesa          | –     |
|    | 12.03.2019 | Galegos da Serra | Cow    | F | 2017 | Maronesa          | –     |
|    | 12.03.2019 | Galegos da Serra | Soil   | – | –    | –                 | –     |
|    | 12.03.2019 | Galegos da Serra | Farmer | – | –    | –                 | –     |
| 22 | 12.03.2019 | Galegos da Serra | Cow    | F | 2005 | Maronesa          | –     |
|    | 12.03.2019 | Galegos da Serra | Cow    | F | 2013 | Maronesa          | –     |
|    | 12.03.2019 | Galegos da Serra | Water  | – | –    | –                 | –     |
|    | 12.03.2019 | Galegos da Serra | Soil   | – | –    | –                 | –     |
| 23 | 12.03.2019 | Galegos da Serra | Cow    | F | 2012 | Maronesa          | –     |
|    | 12.03.2019 | Galegos da Serra | Cow    | F | 2011 | Maronesa          | –     |
|    | 12.03.2019 | Galegos da Serra | Cow    | F | 2017 | Maronesa          | –     |
|    | 12.03.2019 | Galegos da Serra | Water  | – | –    | –                 | –     |
|    | 12.03.2019 | Galegos da Serra | Soil   | – | –    | –                 | –     |
|    | 12.03.2019 | Galegos da Serra | Farmer | – | –    | –                 | –     |
| 24 | 12.03.2019 | Galegos da Serra | Cow    | F | 2015 | Maronesa          | –     |
|    | 12.03.2019 | Galegos da Serra | Cow    | F | 2010 | Maronesa          | –     |
|    | 12.03.2019 | Galegos da Serra | Cow    | F | 2015 | Maronesa          | –     |
|    | 12.03.2019 | Galegos da Serra | Cow    | F | 2008 | Maronesa          | –     |
|    | 12.03.2019 | Galegos da Serra | Cow    | F | 2009 | Maronesa          | –     |
|    | 12.03.2019 | Galegos da Serra | Cow    | F | 2010 | Maronesa          | –     |
|    | 12.03.2019 | Galegos da Serra | Soil   | – | –    | –                 | –     |
|    | 12.03.2019 | Galegos da Serra | Water  | – | –    | –                 | –     |
|    | 12.03.2019 | Galegos da Serra | Farmer | – | –    | –                 | –     |
| 25 | 12.03.2019 | Galegos da Serra | Cow    | F | 2014 | Maronesa          | –     |
|    | 12.03.2019 | Galegos da Serra | Cow    | F | 2014 | Maronesa          | –     |
|    | 12.03.2019 | Galegos da Serra | Cow    | F | 2012 | Maronesa          | –     |
|    | 12.03.2019 | Galegos da Serra | Cow    | F | 2003 | Maronesa          | –     |
|    | 12.03.2019 | Galegos da Serra | Cow    | F | 2005 | Maronesa          | –     |
|    | 12.03.2019 | Galegos da Serra | Water  | – | –    | –                 | –     |
|    | 12.03.2019 | Galegos da Serra | Water  | – | –    | –                 | –     |
|    | 12.03.2019 | Galegos da Serra | Soil   | – | –    | –                 | –     |
|    | 12.03.2019 | Galegos da Serra | Farmer | – | –    | –                 | –     |
|    | 12.03.2019 | Galegos da Serra | Farmer | – | –    | –                 | –     |
|    | 12.03.2019 | Galegos da Serra | Farmer | – | –    | –                 | –     |
|    | 12.03.2019 | Galegos da Serra | Cow    | F | 2007 | Maronesa          | VS324 |
|    | 12.03.2019 | Galegos da Serra | Cow    | F | 2013 | Maronesa          | –     |
|    | 12.03.2019 | Galegos da Serra | Farmer | – | –    | –                 | –     |
| 26 | 12.03.2019 | Galegos da Serra | Cow    | F | 2004 | Maronesa          | –     |
|    | 12.03.2019 | Galegos da Serra | Cow    | F | 2013 | Maronesa          | –     |
|    | 12.03.2019 | Galegos da Serra | Soil   | – | –    | –                 | –     |
|    | 12.03.2019 | Galegos da Serra | Water  | – | –    | –                 | –     |
|    | 12.03.2019 | Galegos da Serra | Farmer | – | –    | –                 | –     |
| 27 | 12.03.2019 | Relva            | Cow    | F | 2011 | Maronesa          | –     |
|    | 12.03.2019 | Relva            | Water  | – | –    | –                 | –     |
|    | 12.03.2019 | Relva            | Soil   | – | –    | –                 | –     |
|    | 12.03.2019 | Relva            | Farmer | – | –    | –                 | –     |
| 28 | 15.03.2019 | Lordelo          | Cow    | F | 2013 | Crossbreed        | –     |
|    | 15.03.2019 | Lordelo          | Cow    | F | 2012 | Crossbreed        | –     |
|    | 15.03.2019 | Lordelo          | Water  | – | –    | –                 | –     |
|    | 15.03.2019 | Lordelo          | Soil   | – | –    | –                 | –     |
|    | 15.03.2019 | Lordelo          | Farmer | – | –    | –                 | –     |
| 29 | 15.03.2019 | Lordelo          | Cow    | M | 2017 | Holstein-Friesian | –     |
|    | 15.03.2019 | Lordelo          | Soil   | – | –    | –                 | –     |
|    | 15.03.2019 | Lordelo          | Water  | – | –    | –                 | –     |
|    | 15.03.2019 | Lordelo          | Cow    | M | 2017 | Crossbreed        | –     |
|    | 15.03.2019 | Lordelo          | Soil   | – | –    | –                 | –     |
|    | 15.03.2019 | Lordelo          | Farmer | – | –    | –                 | –     |

|    |            |         |        |   |      |            |   |
|----|------------|---------|--------|---|------|------------|---|
|    | 15.03.2019 | Lordelo | Farmer | — | —    | —          | — |
| 30 | 15.03.2019 | Lordelo | Cow    | F | 2013 | Crossbreed | — |
|    | 15.03.2019 | Lordelo | Cow    | F | 2015 | Crossbreed | — |
|    | 15.03.2019 | Lordelo | Soil   | — | —    | —          | — |
|    | 15.03.2019 | Lordelo | Farmer | — | —    | —          | — |
| 31 | 15.03.2019 | Lordelo | Cow    | F | 2017 | Maronesa   | — |
|    | 15.03.2019 | Lordelo | Water  | — | —    | —          | — |
|    | 15.03.2019 | Lordelo | Soil   | — | —    | —          | — |
|    | 15.03.2019 | Lordelo | Farmer | — | —    | —          | — |
|    | 15.03.2019 | Lordelo | Farmer | — | —    | —          | — |
| 32 | 18.03.2019 | Lordelo | Cow    | F | 2012 | Maronesa   | — |
|    | 18.03.2019 | Lordelo | Cow    | F | 2014 | Maronesa   | — |
|    | 18.03.2019 | Lordelo | Cow    | F | 2014 | Maronesa   | — |
|    | 18.03.2019 | Lordelo | Soil   | — | —    | —          | — |
|    | 18.03.2019 | Lordelo | Water  | — | —    | —          | — |
| 33 | 18.03.2019 | Lordelo | Cow    | F | 2010 | Maronesa   | — |
|    | 18.03.2019 | Lordelo | Cow    | F | 2013 | Maronesa   | — |
|    | 18.03.2019 | Lordelo | Soil   | — | —    | —          | — |
|    | 18.03.2019 | Lordelo | Water  | — | —    | —          | — |
|    | 18.03.2019 | Lordelo | Farmer | — | —    | —          | — |
| 34 | 18.03.2019 | Lordelo | Cow    | F | 2011 | Maronesa   | — |
|    | 18.03.2019 | Lordelo | Cow    | F | 2012 | Maronesa   | — |
|    | 18.03.2019 | Lordelo | Water  | — | —    | —          | — |
|    | 18.03.2019 | Lordelo | Soil   | — | —    | —          | — |
| 35 | 18.03.2019 | Lordelo | Cow    | F | 2015 | Maronesa   | — |
|    | 18.03.2019 | Lordelo | Cow    | F | 2014 | Maronesa   | — |
|    | 18.03.2019 | Lordelo | Cow    | F | 2016 | Maronesa   | — |
|    | 18.03.2019 | Lordelo | Water  | — | —    | —          | — |
|    | 18.03.2019 | Lordelo | Soil   | — | —    | —          | — |
|    | 18.03.2019 | Lordelo | Farmer | — | —    | —          | — |
| 36 | 18.03.2019 | Lordelo | Cow    | F | 2010 | Maronesa   | — |
|    | 18.03.2019 | Lordelo | Cow    | F | 2011 | Maronesa   | — |
|    | 18.03.2019 | Lordelo | Cow    | F | 2013 | Maronesa   | — |
|    | 18.03.2019 | Lordelo | Water  | — | —    | —          | — |
|    | 18.03.2019 | Lordelo | Soil   | — | —    | —          | — |
|    | 18.03.2019 | Lordelo | Farmer | — | —    | —          | — |
| 37 | 18.03.2019 | Lordelo | Cow    | F | 2009 | Maronesa   | — |
|    | 18.03.2019 | Lordelo | Cow    | F | 2011 | Maronesa   | — |
|    | 18.03.2019 | Lordelo | Cow    | F | 2008 | Maronesa   | — |
|    | 18.03.2019 | Lordelo | Cow    | F | 2011 | Maronesa   | — |
|    | 18.03.2019 | Lordelo | Cow    | F | 2008 | Maronesa   | — |
|    | 18.03.2019 | Lordelo | Cow    | F | 2013 | Maronesa   | — |
|    | 18.03.2019 | Lordelo | Cow    | F | 2009 | Maronesa   | — |
|    | 18.03.2019 | Lordelo | Cow    | F | 2010 | Maronesa   | — |
|    | 18.03.2019 | Lordelo | Cow    | F | 2015 | Maronesa   | — |
|    | 18.03.2019 | Lordelo | Cow    | F | 2012 | Maronesa   | — |
|    | 18.03.2019 | Lordelo | Cow    | F | 2014 | Maronesa   | — |
|    | 18.03.2019 | Lordelo | Cow    | F | 2013 | Maronesa   | — |
|    | 18.03.2019 | Lordelo | Cow    | F | 2007 | Maronesa   | — |
|    | 18.03.2019 | Lordelo | Cow    | M | 2018 | Maronesa   | — |
|    | 18.03.2019 | Lordelo | Water  | — | —    | —          | — |
|    | 18.03.2019 | Lordelo | Soil   | — | —    | —          | — |
| 38 | 18.03.2019 | Lordelo | Cow    | F | 2011 | Maronesa   | — |
|    | 18.03.2019 | Lordelo | Cow    | F | 2009 | Maronesa   | — |
|    | 18.03.2019 | Lordelo | Water  | — | —    | —          | — |
|    | 18.03.2019 | Lordelo | Soil   | — | —    | —          | — |
|    | 18.03.2019 | Lordelo | Cow    | F | 2014 | Maronesa   | — |
|    | 18.03.2019 | Lordelo | Cow    | F | 2012 | Maronesa   | — |

|    |            |             |        |   |      |                   |        |
|----|------------|-------------|--------|---|------|-------------------|--------|
|    | 18.03.2019 | Lordelo     | Cow    | M | 2016 | Maronesa          | –      |
|    | 18.03.2019 | Lordelo     | Water  | – | –    | –                 | –      |
|    | 18.03.2019 | Lordelo     | Soil   | – | –    | –                 | –      |
| 39 | 25.03.2019 | Sapiões     | Cow    | F | 2016 | Maronesa          | VS3245 |
|    | 25.03.2019 | Sapiões     | Cow    | F | 2012 | Maronesa          | –      |
|    | 25.03.2019 | Sapiões     | Cow    | F | 2014 | Maronesa          | VS3246 |
|    | 25.03.2019 | Sapiões     | Cow    | F | 2007 | Maronesa          | VS3247 |
|    | 25.03.2019 | Sapiões     | Cow    | F | 2015 | Maronesa          | VS3248 |
|    | 25.03.2019 | Sapiões     | Farmer | – | –    | –                 | –      |
|    | 25.03.2019 | Sapiões     | Farmer | – | –    | –                 | –      |
| 40 | 25.03.2019 | Sapiões     | Cow    | F | 2014 | Maronesa          | –      |
|    | 25.03.2019 | Sapiões     | Farmer | – | –    | –                 | –      |
| 41 | 25.03.2019 | Sapiões     | Cow    | F | 2013 | Crossbreed        | –      |
|    | 25.03.2019 | Sapiões     | Cow    | F | 2011 | Crossbreed        | –      |
|    | 25.03.2019 | Sapiões     | Soil   | – | –    | –                 | –      |
| 42 | 25.03.2019 | Sapiões     | Cow    | F | 2006 | Maronesa          | –      |
|    | 25.03.2019 | Sapiões     | Cow    | F | 2009 | Maronesa          | –      |
|    | 25.03.2019 | Sapiões     | Cow    | F | 2015 | Crossbreed        | –      |
|    | 25.03.2019 | Sapiões     | Cow    | F | 2009 | Holstein-Friesian | –      |
|    | 25.03.2019 | Sapiões     | Cow    | F | 2014 | Maronesa          | VS3249 |
|    | 25.03.2019 | Sapiões     | Water  | – | –    | –                 | –      |
|    | 25.03.2019 | Sapiões     | Soil   | – | –    | –                 | –      |
|    | 25.03.2019 | Sapiões     | Farmer | – | –    | –                 | –      |
| 43 | 25.03.2019 | Gulpilhares | Cow    | F | 2003 | Maronesa          | –      |
|    | 25.03.2019 | Gulpilhares | Water  | – | –    | –                 | –      |
|    | 25.03.2019 | Gulpilhares | Soil   | – | –    | –                 | –      |
|    | 25.03.2019 | Gulpilhares | Farmer | – | –    | –                 | –      |
| 44 | 25.03.2019 | Gulpilhares | Cow    | F | 2015 | Crossbreed        | –      |
|    | 25.03.2019 | Gulpilhares | Cow    | F | 2013 | Crossbreed        | –      |
|    | 25.03.2019 | Gulpilhares | Cow    | F | 2000 | Crossbreed        | –      |
|    | 25.03.2019 | Gulpilhares | Water  | – | –    | –                 | –      |
|    | 25.03.2019 | Gulpilhares | Soil   | – | –    | –                 | –      |
|    | 25.03.2019 | Gulpilhares | Farmer | – | –    | –                 | –      |
| 45 | 25.03.2019 | Gulpilhares | Cow    | F | 2013 | Maronesa          | –      |
|    | 25.03.2019 | Gulpilhares | Cow    | F | 2010 | Maronesa          | –      |
|    | 25.03.2019 | Gulpilhares | Soil   | – | –    | –                 | –      |
|    | 25.03.2019 | Gulpilhares | Farmer | – | –    | –                 | –      |
| 46 | 25.03.2019 | Gulpilhares | Cow    | F | 2013 | Holstein-Friesian | –      |
|    | 25.03.2019 | Gulpilhares | Soil   | – | –    | –                 | –      |
|    | 25.03.2019 | Gulpilhares | Farmer | – | –    | –                 | VS3250 |
| 47 | 25.03.2019 | Gulpilhares | 1056   | F | 2007 | Holstein-Friesian | VS3251 |
|    | 25.03.2019 | Gulpilhares | Soil   | – | –    | –                 | –      |
|    | 25.03.2019 | Gulpilhares | Farmer | – | –    | –                 | VS3252 |
| 48 | 25.03.2019 | Gulpilhares | Cow    | F | 2013 | Holstein-Friesian | –      |
|    | 25.03.2019 | Quintelas   | Cow    | F | 2011 | Crossbreed        | –      |
|    | 25.03.2019 | Gulpilhares | Water  | – | –    | –                 | –      |
|    | 25.03.2019 | Gulpilhares | Soil   | – | –    | –                 | –      |
|    | 25.03.2019 | Gulpilhares | Farmer | – | –    | –                 | VS3253 |
|    | 25.03.2019 | Quintelas   | Cow    | F | 2006 | Maronesa          | –      |
|    | 25.03.2019 | Quintelas   | Cow    | F | 2007 | Maronesa          | –      |
| 49 | 25.03.2019 | Quintelas   | Farmer | – | –    | –                 | VS3254 |
|    | 26.03.2019 | Mondrões    | Cow    | M | 2018 | Maronesa          | –      |
|    | 26.03.2019 | Mondrões    | Cow    | F | 2010 | Maronesa          | –      |
|    | 26.03.2019 | Mondrões    | Cow    | F | 2015 | Maronesa          | VS3255 |

|    |            |          |        |   |      |            |        |
|----|------------|----------|--------|---|------|------------|--------|
|    | 26.03.2019 | Mondrões | Cow    | F | 2013 | Maronesa   | VS3256 |
|    | 26.03.2019 | Mondrões | Cow    | F | 2015 | Maronesa   | –      |
|    | 26.03.2019 | Mondrões | Water  | – | –    | –          | –      |
|    | 26.03.2019 | Mondrões | Soil   | – | –    | –          | –      |
| 50 | 26.03.2019 | Mondrões | Cow    | F | 2010 | Maronesa   | –      |
|    | 26.03.2019 | Mondrões | Farmer | – | –    | –          | –      |
|    | 26.03.2019 | Arrabães | Cow    | F | 2001 | Maronesa   | –      |
| 51 | 26.03.2019 | Arrabães | Cow    | F | 2002 | Maronesa   | –      |
|    | 26.03.2019 | Arrabães | Water  | – | –    | –          | –      |
|    | 26.03.2019 | Arrabães | Soil   | – | –    | –          | –      |
|    | 01.04.2019 | Relva    | Cow    | F | 2007 | Maronesa   | –      |
|    | 01.04.2019 | Relva    | Cow    | F | 2010 | Crossbreed | VS3257 |
|    | 01.04.2019 | Relva    | Cow    | F | 2013 | Maronesa   | –      |
|    | 01.04.2019 | Relva    | Cow    | F | 2015 | Maronesa   | –      |
|    | 01.04.2019 | Relva    | Cow    | F | 2015 | Crossbreed | –      |
|    | 01.04.2019 | Relva    | Cow    | F | 2016 | Crossbreed | –      |
|    | 01.04.2019 | Relva    | Cow    | F | 2013 | Crossbreed | VS3258 |
|    | 01.04.2019 | Relva    | Cow    | F | 2015 | Crossbreed | –      |
|    | 01.04.2019 | Relva    | Cow    | F | 2008 | Maronesa   | –      |
| 52 | 01.04.2019 | Relva    | Cow    | F | 2012 | Maronesa   | –      |
|    | 01.04.2019 | Relva    | Cow    | F | 2013 | Maronesa   | –      |
|    | 01.04.2019 | Relva    | Cow    | F | 2017 | Maronesa   | –      |
|    | 01.04.2019 | Relva    | Farmer | – | –    | –          | VS3259 |
|    | 01.04.2019 | Relva    | Farmer | – | –    | –          | –      |
|    | 01.04.2019 | Relva    | Farmer | – | –    | –          | –      |
|    | 01.04.2019 | Relva    | Farmer | – | –    | –          | VS3260 |
|    | 01.04.2019 | Relva    | Farmer | – | –    | –          | VS3261 |
|    | 01.04.2019 | Relva    | Water  | – | –    | –          | –      |
|    | 01.04.2019 | Relva    | Soil   | – | –    | –          | –      |
|    | 01.04.2019 | Borbela  | Cow    | F | 2009 | Crossbreed | –      |
| 53 | 01.04.2019 | Borbela  | Farmer | – | –    | –          | –      |
|    | 01.04.2019 | Borbela  | Water  | – | –    | –          | –      |
|    | 01.04.2019 | Borbela  | Soil   | – | –    | –          | –      |
|    | 01.04.2019 | Borbela  | Cow    | F | 2004 | Maronesa   | –      |
| 54 | 01.04.2019 | Borbela  | Cow    | F | 2011 | Maronesa   | –      |
|    | 01.04.2019 | Borbela  | Cow    | F | 2018 | Maronesa   | –      |
|    | 01.04.2019 | Borbela  | Cow    | F | 2012 | Maronesa   | –      |
|    | 01.04.2019 | Borbela  | Cow    | F | 2010 | Crossbreed | –      |
|    | 01.04.2019 | Borbela  | Cow    | F | 2003 | Crossbreed | –      |
| 55 | 01.04.2019 | Borbela  | Cow    | F | 2007 | Crossbreed | –      |
|    | 01.04.2019 | Borbela  | Cow    | F | 2016 | Crossbreed | –      |
|    | 01.04.2019 | Borbela  | Water  | – | –    | –          | VS3262 |
|    | 01.04.2019 | Borbela  | Soil   | – | –    | –          | –      |
|    | 01.04.2019 | Borbela  | Cow    | F | 2013 | Maronesa   | –      |
| 56 | 01.04.2019 | Borbela  | Water  | – | –    | –          | –      |
|    | 01.04.2019 | Borbela  | Soil   | – | –    | –          | –      |
|    | 01.04.2019 | Borbela  | Farmer | – | –    | –          | VS3263 |
|    | 02.04.2019 | Agarez   | Cow    | F | 2015 | Maronesa   | –      |
|    | 02.04.2019 | Agarez   | Cow    | F | 2005 | Maronesa   | –      |
|    | 02.04.2019 | Agarez   | Cow    | F | 2017 | Maronesa   | –      |
|    | 02.04.2019 | Agarez   | Cow    | F | 2013 | Maronesa   | –      |
|    | 02.04.2019 | Agarez   | Cow    | F | 2010 | Maronesa   | –      |
| 57 | 02.04.2019 | Agarez   | Cow    | F | 2007 | Maronesa   | –      |
|    | 02.04.2019 | Agarez   | Cow    | M | 2018 | Maronesa   | –      |
|    | 02.04.2019 | Agarez   | Cow    | F | 2018 | Maronesa   | –      |
|    | 02.04.2019 | Agarez   | Water  | – | –    | –          | –      |
|    | 02.04.2019 | Agarez   | Soil   | – | –    | –          | –      |
|    | 02.04.2019 | Agarez   | Farmer | – | –    | –          | –      |

|    |            |        |        |   |      |                   |                   |
|----|------------|--------|--------|---|------|-------------------|-------------------|
| 58 | 02.04.2019 | Agarez | Cow    | F | 2014 | Maronesa          | –                 |
|    | 02.04.2019 | Agarez | Cow    | F | 2010 | Maronesa          | –                 |
|    | 02.04.2019 | Agarez | Cow    | F | 2015 | Maronesa          | –                 |
|    | 02.04.2019 | Agarez | Cow    | F | 2014 | Maronesa          | –                 |
|    | 02.04.2019 | Agarez | Cow    | F | 2015 | Maronesa          | –                 |
|    | 02.04.2019 | Agarez | Water  | – | –    | –                 | –                 |
|    | 02.04.2019 | Agarez | Soil   | – | –    | –                 | –                 |
|    | 02.04.2019 | Agarez | Farmer | – | –    | –                 | VS3264            |
| 59 | 02.04.2019 | Agarez | Cow    | F | 2017 | Maronesa          | –                 |
|    | 02.04.2019 | Agarez | Cow    | F | 2018 | Crossbreed        | –                 |
|    | 02.04.2019 | Agarez | Cow    | F | 2018 | Crossbreed        | –                 |
|    | 02.04.2019 | Agarez | Water  | – | –    | –                 | –                 |
|    | 02.04.2019 | Agarez | Soil   | – | –    | –                 | –                 |
|    | 02.04.2019 | Agarez | Farmer | – | –    | –                 | –                 |
| 60 | 02.04.2019 | Agarez | Cow    | M | 2018 | Crossbreed        | VS3265            |
|    | 02.04.2019 | Agarez | Cow    | M | 2018 | Crossbreed        | VS3266 and VS3267 |
|    | 02.04.2019 | Agarez | Cow    | F | 2018 | Holstein-Friesian | –                 |
|    | 02.04.2019 | Agarez | Water  | – | –    | –                 | –                 |
|    | 02.04.2019 | Agarez | Soil   | – | –    | –                 | –                 |
| 61 | 02.04.2019 | Agarez | Cow    | F | 2015 | Maronesa          | –                 |
|    | 02.04.2019 | Agarez | Water  | – | –    | –                 | –                 |
|    | 02.04.2019 | Agarez | Soil   | – | –    | –                 | –                 |
| 62 | 02.04.2019 | Agarez | Cow    | F | 2015 | Maronesa          | –                 |
|    | 02.04.2019 | Agarez | Cow    | F | 2016 | Maronesa          | –                 |
|    | 02.04.2019 | Agarez | Cow    | F | 2010 | Maronesa          | VS3268            |
|    | 02.04.2019 | Agarez | Cow    | F | 2011 | Maronesa          | VS3269            |
|    | 02.04.2019 | Agarez | Water  | – | –    | –                 | –                 |
|    | 02.04.2019 | Agarez | Soil   | – | –    | –                 | –                 |
|    | 02.04.2019 | Agarez | Farmer | – | –    | –                 | VS3270            |
|    | 02.04.2019 | Agarez | Farmer | – | –    | –                 | VS3271            |
| 63 | 02.04.2019 | Agarez | Cow    | M | 2017 | Maronesa          | VS3272            |
|    | 02.04.2019 | Agarez | Cow    | M | 2017 | Maronesa          | –                 |
|    | 02.04.2019 | Agarez | Cow    | F | 2017 | Maronesa          | –                 |
|    | 02.04.2019 | Agarez | Cow    | F | 2017 | Maronesa          | –                 |
|    | 02.04.2019 | Agarez | Cow    | F | 2011 | Maronesa          | –                 |
|    | 02.04.2019 | Agarez | Cow    | F | 2004 | Maronesa          | VS3273            |
|    | 02.04.2019 | Agarez | Cow    | F | 2008 | Maronesa          | –                 |
|    | 02.04.2019 | Agarez | Cow    | F | 2016 | Maronesa          | –                 |
|    | 02.04.2019 | Agarez | Cow    | F | 2014 | Maronesa          | –                 |
|    | 02.04.2019 | Agarez | Cow    | F | 2016 | Maronesa          | –                 |
|    | 02.04.2019 | Agarez | Cow    | F | 2012 | Maronesa          | –                 |
|    | 02.04.2019 | Agarez | Cow    | F | 2009 | Maronesa          | –                 |
|    | 02.04.2019 | Agarez | Cow    | F | 2016 | Maronesa          | –                 |
|    | 02.04.2019 | Agarez | Water  | – | –    | –                 | –                 |
|    | 02.04.2019 | Agarez | Soil   | – | –    | –                 | –                 |
|    | 02.04.2019 | Agarez | Farmer | – | –    | –                 | –                 |
|    | 02.04.2019 | Agarez | Farmer | – | –    | –                 | –                 |
| 64 | 02.04.2019 | Agarez | Cow    | F | 2015 | Crossbreed        | VS3274            |
|    | 02.04.2019 | Agarez | Water  | – | –    | –                 | –                 |
|    | 02.04.2019 | Agarez | Soil   | – | –    | –                 | –                 |
|    | 02.04.2019 | Agarez | Farmer | – | –    | –                 | VS3275            |



**Table S2.** Primer pairs used for molecular typing and detection of antimicrobial resistance genes in *S. aureus* strains.

| Gene (Am-<br>plicon Size)   | Sequence (5' > 3')                                                       | Conditions                                             | Reference |
|-----------------------------|--------------------------------------------------------------------------|--------------------------------------------------------|-----------|
|                             |                                                                          | 94 °C 5 min 1 cycle                                    |           |
| <i>mecA</i><br>(527 bp)     | F: GGGATCATAGCGTCATTATTC<br>R: AACGATTGTGACACGATAGCC                     | 94 °C 30 sec<br>55 °C 30 sec 30 cycles<br>72 °C 1 min  | [77]      |
|                             |                                                                          | 72 °C 10 min 1 cycle<br>94 °C 3 min 1 cycle            |           |
| <i>blaZ</i><br>(772 bp)     | F: CAGTTCACATGCCAAAGAG<br>R: TACACTCTTGGCGGTTTC                          | 94 °C 1 min<br>50 °C 1 min 30 cycles<br>72 °C 2 min    | [78]      |
| <i>ermA</i><br>(645 bp)     | F: TCTAAAAAGCATGTAAAAGAA<br>R: CTTCGATAGTTTATTAATATTAG                   | 72 °C 5 min 1 cycle<br>93 °C 3 min 1 cycle             | [79]      |
| <i>ermB</i><br>(639 bp)     | F: GAAAAGTACTCAACCAAATA<br>R: AGTAACGGTACTTAAATTGTTTA                    | 93 °C 1 min<br>52 °C 1 min 35 cycles<br>72 °C 1 min    | [37]      |
| <i>ermC</i><br>(642 bp)     | F: TCAAAACATAATATAGATAAA<br>R: GCTAATATTGTTTAAATCGTCAAT                  |                                                        | [79]      |
|                             |                                                                          | 72 °C 5 min 1 cycle<br>94 °C 3 min 1 cycle             |           |
| <i>ermT</i><br>(200 bp)     | F: CCGCCATTGAAATAGATCCT<br>R: TTCTGTAGCTGTGCTTTCAAAAA                    | 94 °C 1 min<br>55 °C 1 min 30 cycles<br>72 °C 1 min    | [80]      |
|                             |                                                                          | 72 °C 5 min 1 cycle<br>95 °C 3 min 1 cycle             |           |
| <i>msr(A/B)</i><br>(399 bp) | F: GCAAATGGTGTAGGTAAGACAACT<br>R: ATCATGTGATGTAAACAAAAT                  | 93 °C 30 sec<br>55 °C 2 min 35 cycles<br>72 °C 1,5 min | [81]      |
|                             |                                                                          | 72 °C 5 min 1 cycle<br>94 °C 3 min 1 cycle             |           |
| <i>mph(C)</i><br>(900 bp)   | F: ATGACTCGACATAATGAAAT<br>R: CTACTCTTTCATACCTAACTC                      | 94 °C 1 min<br>45 °C 1 min 30 cycles<br>72 °C 1 min    | [78]      |
|                             |                                                                          | 72 °C 5 min 1 cycle<br>94 °C 2 min 1 cycle             |           |
| <i>lnu(A)</i><br>(323 bp)   | F: GGTGGCTGGGGGGTAGATGTATTAAGTGG<br>R: GCTTCTTTTGAAATACATGGTATTTTTTCGATC | 94 °C 30 sec<br>57 °C 30 sec 30 cycles<br>72 °C 1 min  | [82]      |
|                             |                                                                          | 72 °C 10 min 1 cycle<br>94 °C 5 min 1 cycle            |           |
| <i>lnu(B)</i><br>(944 bp)   | F: CCTACCTATTGTTTGTGGAA<br>R: ATAACGTTACTCTCCTATTC                       | 94 °C 45 sec<br>54 °C 45 sec 30 cycles<br>72 °C 1 min  | [83]      |

|                                           |                                                        |                                                       |      |
|-------------------------------------------|--------------------------------------------------------|-------------------------------------------------------|------|
|                                           |                                                        | 72 °C 5 min 1 cycle<br>94 °C 3 min 1 cycle            |      |
| <i>vga(A)</i><br>(1264 bp)                | F: AGTGGTGGTGAAGTAACACG<br>R: GGTTC AATACTCAATCGACTGAG | 94 °C 1 min<br>56 °C 1 min 30 cycles<br>72 °C 1 min   | [84] |
|                                           |                                                        | 72 °C 5 min 1 cycle<br>94 °C 1 min 1 cycle            |      |
| <i>vga(B)</i><br>(576 pb)                 | F: TGACAATATGAGTGGTGGTG<br>R: GCGACCATGAAATTGCTCTC     | 94 °C 1 min<br>55 °C 2 min 30 cycles<br>72 °C 2 min   | [85] |
|                                           |                                                        | 72 °C 10 min 1 cycle<br>94 °C 3 min 1 cycle           | [86] |
| <i>tetK</i><br>(697 bp)                   | F: TTAGGTGAAGGGTTAGGTCC<br>R: GCAAAC TCATTCCAGAAGCA    | 94 °C 1 min<br>54 °C 1 min 30 cycles<br>72 °C 1 min   | [86] |
| <i>tetM</i><br>(576 bp)                   | F: GTTAAATAGTGTCTTGGAG<br>R: CTAAGATATGGCTCTAACAA      | 72 °C 5 min 1 cycle<br>94 °C 1 min 1 cycle            | [86] |
| <i>tetO</i><br>(615 bp)                   | F: GATGGCATA CAGGCACAGAC<br>R: CAATATCACCAGAGCAGGCT    | 94 °C 1 min<br>50 °C 1 min 30 cycles<br>72 °C 1 min   | [86] |
| <i>tetL</i><br>(456 bp)                   | F: CATTTGGTCTTATTGGATCG<br>R: ATTACACTTCCGATTTCGG      | 72 °C 10 min 1 cycle<br>94 °C 5 min 1 cycle           |      |
| <i>aac(6')-Ie-aph(2'')-Ia</i><br>(220 bp) | F: CCAAGAGCAATAAGGGCATA<br>R: CACTATCATAACCACTACCG     | 94 °C 30 sec<br>60 °C 45 sec 30 cycles<br>72 °C 2 min | [87] |
|                                           |                                                        | 72 °C 7 min 1 cycle<br>94 °C 3 min 1 cycle            |      |
| <i>ant(4')-Ia</i><br>(160 bp)             | F: GCAAGGACCGACAACATTTC<br>R: TGGCACAGATGGTCATAACC     | 94 °C 30 sec<br>60 °C 45 sec 30 cycles<br>72 °C 2 min | [87] |
|                                           |                                                        | 72 °C 5 min 1 cycle<br>94 °C 3 min 1 cycle            |      |
| <i>str</i><br>(646 bp)                    | F: TATTGCTCTCGAGGGTTC<br>R: CTTTCTATATCCATT CATCTC     | 94 °C 1 min<br>50 °C 1 min 30 cycles<br>72 °C 1 min   | [78] |
|                                           |                                                        | 72 °C 5 min 1 cycle<br>94 °C 3 min 1 cycle            |      |
| <i>aph(3')-III</i><br>(292 bp)            | F: GCCGATGTGGATTGCGAAAA<br>R: GCTTGATCCCCAGTAAGTCA     | 94 °C 30 sec<br>60 °C 45 sec 30 cycles<br>72 °C 2 min | [87] |
|                                           |                                                        | 72 °C 5 min 1 cycle                                   |      |

|                                        |                                                                 |                                                        |      |
|----------------------------------------|-----------------------------------------------------------------|--------------------------------------------------------|------|
|                                        |                                                                 | 94 °C 1 min 1 cycle                                    |      |
| <i>fexA</i><br>(1272 bp)               | F: GTACTTGTAGGTGCAATTACGGCTGA<br>R: CGCATCTGAGTAGGACATAGCGTC    | 94 °C 1 min<br>48 °C 2 min 34 cycles<br>72 °C 3 min    | [88] |
|                                        |                                                                 | 72 °C 7 min 1 cycle<br>94 °C 7min<br>min 1 cycle       |      |
| <i>fexB</i><br>(816 bp)                | F: TTCCCACTATTGGTGAAAGGAT<br>R: GCAATTCCTTTTATGGACGTT           | 94 °C 1 min<br>55 °C 1 min 30 cycles<br>72 °C 1 min    | [89] |
| <i>cat<sub>pC194</sub></i><br>(570 bp) | F: CGACTTTTAGTATAACCACAGA<br>R: GCCAGTCATTAGGCCTAT              | 72 °C 10 min 1 cycle<br>94 °C 3 min 1 cycle            | [78] |
| <i>cat<sub>pC221</sub></i><br>(434 bp) | F: ATTTATGCAATTATGGAAGTTG<br>R: TGAAGCATGGTAACCATCAC            | 94 °C 1 min<br>50 °C 1 min 30 cycles<br>72 °C 1 min    | [78] |
| <i>cat<sub>pC223</sub></i><br>(283 bp) | F: GAATCAAATGCTAGTTTTAACTC<br>R: ACATGGTAACCATCACATAC           |                                                        | [78] |
|                                        |                                                                 | 72 °C 5 min 1 cycle<br>94 °C 3 min 1 cycle             |      |
| <i>cfr</i><br>(746 bp)                 | F: TGAAGTATAAAGCAGGTTGGGAGTCA<br>R: ACCATATAATTGACCACAAGCAGC    | 94 °C 1 min<br>56 °C 1 min 30 cycles<br>72 °C 1 min    | [88] |
| <i>fusB</i><br>(431 bp)                | F: CTATAATGATATTAATGAGATTTTGG<br>R: TTTTACATATTGACCATCCGAATTGG  | 72 °C 5 min 1 cycle<br>94 °C 3 min 1 cycle             |      |
| <i>fusC</i><br>(332 bp)                | F: TTAAAGAAAAAGATATTGATATCTCGG<br>R: TTTACAGAATCCTTTTACTTTATTGG | 94 °C 30 sec<br>57 °C 30 sec 25 cycles<br>72 °C 45 sec | [90] |
|                                        |                                                                 | 72 °C 7 min 1 cycle<br>94 °C 7 min 1 cycle             |      |
| <i>fusD</i><br>(456 bp)                | F: AATTCGGTCAACGATCCC<br>R: GCCATCATTGCCAGTACG                  | 94 °C 30 sec<br>57 °C 30 sec 30 cycles<br>72 °C 30 sec | [91] |
| <i>dfrA</i><br>(374 bp)                | F: CCTTGGCACTTACCAAATG<br>R: CTGAAGATTGCGACTTCCC                | 72 °C 10 min 1 cycle<br>94 °C 3 min 1 cycle            |      |
| <i>dfrD</i><br>(582 bp)                | F: TTCTTTAATTGTTGCGATGG<br>R: TTAACGAATTCTCTCATATATATG          | 94 °C 1 min<br>50 °C 1 min 30 cycles<br>72 °C 1 min    | [78] |
|                                        |                                                                 | 72 °C 5 min 1 cycle<br>94 °C 3 min 1 cycle             |      |
| <i>dfrG</i><br>(323 bp)                | F: TCGGAAGAGCCTTACCTGACAGAA<br>R: CCCTTTTTGGGCAAATACCTCATTCCA   | 94 °C 1 min<br>58 °C 1 min 30 cycles<br>72 °C 1 min    | [80] |
| <i>dfrK</i>                            | F: GAGAATCCCAGAGGATTGGG                                         | 72 °C 5 min 1 cycle<br>94 °C 3 min 1 cycle             |      |

---

(423 bp)

R: CAAGAAGCTTTTCGCTCATAAA

94 °C 1 min

56 °C 1 min 30 cycles

72 °C 1 min

72 °C 5 min 1 cycle

---
